# Supplementary material
Source: publisher figshare collection journal article supplement (https://gsajournals.figshare.com/ndownloader/files/17609279)
Supplement: Supplementary file 1 [file 17609279]

## Sheet: Table S3
Table S3.
			RV1/RV2	RV1/RV2	RV1/ura3-det	snp	snp	CHEF/Southern		snp	URA3 loss	accompanying
genotype	Expt	strain ID	RAD52	hisG	URA3	122	123	COX12	cen6	132	mechanism	(additional)
			~97 kb	neg =1 or 2 copies of RAD52	neg = loop-out	196 kb	433 kb	936 kb	980kb	1020 kb		events
RAD52	1	CAGL1A	pos	neg	pos, parent	het	het	wt		het	parent
RAD52	1	CAGL1A-1	pos	pos	neg	het	het	wt		het	SSA
RAD52	1	CAGL1A-2	pos	pos	neg	het	het	wt		het	SSA
RAD52	1	CAGL1A-3	pos	pos	neg	het	het	wt		het	SSA
RAD52	1	CAGL1A-4	pos	pos	neg	het	het	wt		het	SSA
RAD52	1	CAGL1A-5	pos	pos	neg	het	het	wt		het	SSA
RAD52	1	CAGL1A-6	pos	pos	neg	het	het	wt		het	SSA
RAD52	1	CAGL1A-7	pos	pos	neg	het	het	wt		het	SSA
RAD52	1	CAGL1A-8	pos	pos	neg	het	het	wt		het	SSA
RAD52	1	CAGL1A-9	pos	pos	neg	het	het	wt		het	SSA
RAD52	1	CAGL1A-10	pos	pos	neg	het	het	wt		het	SSA
RAD52	1	CAGL1A-11	pos	pos	neg	het	het	wt		het	SSA
RAD52	1	CAGL1A-12	pos	pos	neg	het	het	wt		het	SSA
RAD52	1	CAGL1A-13	pos	pos	neg	het	het	wt		het	SSA
RAD52	1	CAGL1A-14	pos	pos	neg	het	het	wt		het	SSA
RAD52	1	CAGL1A-15	pos	pos	neg	het	het	wt		het	SSA
RAD52	1	CAGL1A-16	pos	pos	neg	het	het	wt		het	SSA
RAD52	1	CAGL1A-17	pos	pos	neg	het	het	wt		het	SSA
RAD52	1	CAGL1A-18	pos	pos	neg	het	het	wt		het	SSA
RAD52	1	CAGL1A-19	pos	pos	neg	het	het	wt		het	SSA
RAD52	1	CAGL1A-20	pos	pos	neg	het	het	wt		het	SSA
RAD52	1	CAGL1A-21	pos	pos	neg	het	het	wt		het	SSA
RAD52	1	CAGL1A-22	pos	pos	neg	het	het	wt		het	SSA
RAD52	1	CAGL1A-23	pos	pos	neg	het	het	wt		het	SSA
RAD52	1	CAGL1A-24	pos	pos	neg	het	het	wt		het	SSA
RAD52	2	CAGL1A-1	pos	pos	neg	het	het	wt		het	SSA
RAD52	2	CAGL1A-2	pos	pos	neg	het	het	wt		het	SSA
RAD52	2	CAGL1A-3	pos	pos	neg	het	het	wt		het	SSA
RAD52	2	CAGL1A-4	pos	pos	neg	het	het	wt		het	SSA
RAD52	2	CAGL1A-5	pos	neg	neg	homB	homB	wt		het	IHR (XO/BIR)
RAD52	2	CAGL1A-6	pos	pos	neg	het	het	wt		het	SSA
RAD52	2	CAGL1A-7	pos	pos	neg	het	het	wt		het	SSA
RAD52	2	CAGL1A-8	pos	neg	neg	homB	homB	wt		het	IHR (XO/BIR)
RAD52	2	CAGL1A-9	pos	pos	neg	het	het	wt		het	SSA
RAD52	2	CAGL1A-10	pos	pos	neg	het	het	wt		het	SSA
RAD52	2	CAGL1A-11	pos	pos	neg	het	het	wt		het	SSA
RAD52	2	CAGL1A-12	pos	pos	neg	het	het	wt		het	SSA
RAD52	2	CAGL1A-13	pos	pos	neg	het	het	wt		het	SSA
RAD52	2	CAGL1A-14	pos	pos	neg	het	het	wt		het	SSA
RAD52	2	CAGL1A-15	pos	pos	neg	het	het	wt		het	SSA
RAD52	2	CAGL1A-16	pos	pos	neg	het	het	wt		het	SSA
RAD52	2	CAGL1A-17	pos	pos	neg	het	het	wt		het	SSA
RAD52	2	CAGL1A-18	pos	pos	neg	het	het	wt		het	SSA
RAD52	2	CAGL1A-19	pos	pos	neg	het	het	wt		het	SSA
RAD52	2	CAGL1A-20	pos	pos	neg	het	het	wt		het	SSA
RAD52	1	CAGL1B	pos	neg	pos, parent	het	het	wt		het	parent
RAD52	1	CAGL1B-1	pos	pos	neg	het	het	wt		het	SSA
RAD52	1	CAGL1B-2	pos	pos	neg	het	het	wt		het	SSA
RAD52	1	CAGL1B-3	pos	pos	neg	het	het	wt		het	SSA
RAD52	1	CAGL1B-4	pos	pos	neg	het	het	wt		het	SSA
RAD52	1	CAGL1B-5	pos	pos	neg	het	het	wt		het	SSA
RAD52	1	CAGL1B-6	pos	pos	neg	het	het	wt		het	SSA
RAD52	1	CAGL1B-7	pos	pos	neg	het	het	wt		het	SSA
RAD52	1	CAGL1B-8	pos	pos	neg	het	het	wt		het	SSA
RAD52	1	CAGL1B-9	pos	pos	neg	het	het	wt		het	SSA
RAD52	1	CAGL1B-10	pos	pos	neg	het	het	wt		het	SSA
RAD52	1	CAGL1B-11	pos	pos	neg	het	het	wt		het	SSA
RAD52	1	CAGL1B-12	pos	pos	neg	het	het	wt		het	SSA
RAD52	1	CAGL1B-13	pos	pos	neg	het	het	wt		het	SSA
RAD52	1	CAGL1B-14	pos	neg	neg	homA	homA	wt		het	IHR (XO/BIR)
RAD52	1	CAGL1B-15	pos	pos	neg	het	het	wt		het	SSA
RAD52	1	CAGL1B-16	pos	pos	neg	het	het	wt		het	SSA
RAD52	1	CAGL1B-17	pos	pos	neg	het	het	wt		het	SSA
RAD52	1	CAGL1B-18	pos	pos	neg	het	het	wt		het	SSA
RAD52	1	CAGL1B-19	pos	pos	neg	het	het	wt		het	SSA
RAD52	1	CAGL1B-20	pos	neg	neg	homA	homA	wt		het	IHR (XO/BIR)
RAD52	1	CAGL1B-21	pos	pos	neg	het	het	wt		het	SSA
RAD52	1	CAGL1B-22	pos	pos	neg	het	het	wt		het	SSA
RAD52	1	CAGL1B-23	pos	pos	neg	het	het	wt		het	SSA
RAD52	1	CAGL1B-24	pos	pos	neg	het	het	wt		het	SSA
RAD52	2	CAGL1B	pos	neg	pos parent	het	het	wt		het
RAD52	2	CAGL1B-1	pos	pos	neg	het	het	wt		het	SSA
RAD52	2	CAGL1B-2	pos	pos	neg	het	het	wt		het	SSA
RAD52	2	CAGL1B-3	pos	pos	neg	het	het	wt		het	SSA
RAD52	2	CAGL1B-4	pos	pos	neg	het	het	wt		het	SSA
RAD52	2	CAGL1B-5	pos	pos	neg	het	het	wt		het	SSA
RAD52	2	CAGL1B-6	pos	pos	neg	het	het	wt		het	SSA
RAD52	2	CAGL1B-7	pos	pos	neg	het	het	wt		het	SSA
RAD52	2	CAGL1B-8	pos	pos	neg	het	het	wt		het	SSA
RAD52	2	CAGL1B-9	pos	pos	neg	het	het	wt		het	SSA
RAD52	2	CAGL1B-10	pos	pos	neg	het	het	wt		het	SSA
RAD52	2	CAGL1B-11	pos	pos	neg	het	het	wt		het	SSA
RAD52	2	CAGL1B-12	pos	pos	neg	het	het	wt		het	SSA
RAD52	2	CAGL1B-13	pos	pos	neg	het	het	wt		het	SSA
RAD52	2	CAGL1B-14	pos	pos	neg	het	het	wt		het	SSA
RAD52	2	CAGL1B-15	pos	pos	neg	het	het	wt		het	SSA
RAD52	2	CAGL1B-16	pos	pos	neg	het	het	wt		het	SSA
RAD52	2	CAGL1B-17	pos	pos	neg	het	het	wt		het	SSA
RAD52	2	CAGL1B-18	pos	pos	neg	het	het	wt		het	SSA
RAD52	2	CAGL1B-19	pos	neg	neg	homA	homA	wt		het	IHR (XO/BIR)
RAD52	2	CAGL1B-20	pos	pos	neg	het	het	wt		het	SSA
RAD52,rad59	1	CAGL2A	pos	neg	pos, parent	het	het	wt		het	parent
RAD52,rad59	1	CAGL2A-1	pos	pos	neg	het	het	wt		het	SSA
RAD52,rad59	1	CAGL2A-2	pos	neg	neg	homb	homb	wt		het	IHR (XO/BIR)
RAD52,rad59	1	CAGL2A-3	pos	pos	neg	het	het	wt		het	SSA
RAD52,rad59	1	CAGL2A-4	pos	pos	neg	het	het	wt		het	SSA
RAD52,rad59	1	CAGL2A-5	pos	neg	neg	homb	homb	wt		het	IHR (XO/BIR)
RAD52,rad59	1	CAGL2A-6	pos	neg	neg	homb	homb	wt		het	IHR (XO/BIR)
RAD52,rad59	1	CAGL2A-7	pos	pos	neg	het	het	wt		het	SSA
RAD52,rad59	1	CAGL2A-8	pos	pos	neg	het	het	wt		het	SSA
RAD52,rad59	1	CAGL2A-9	pos	pos	neg	het	het	wt		het	SSA
RAD52,rad59	1	CAGL2A-10	pos	pos	neg	het	het	wt		het	SSA
RAD52,rad59	1	CAGL2A-11	pos	pos	neg	het	het	wt		het	SSA
RAD52,rad59	1	CAGL2A-12	pos	pos	neg	het	het	wt		het	SSA
RAD52,rad59	1	CAGL2A-13	pos	pos	neg	het	het	wt		het	SSA
RAD52,rad59	1	CAGL2A-14	pos	pos	neg	het	het	wt		het	SSA
RAD52,rad59	1	CAGL2A-15	pos	pos	neg	het	het	wt		het	SSA
RAD52,rad59	1	CAGL2A-16	pos	pos	neg	het	het	wt		het	SSA
RAD52,rad59	1	CAGL2A-17	pos	pos	neg	het	het	wt		het	SSA
RAD52,rad59	1	CAGL2A-18	pos	pos	neg	het	het	wt		het	SSA
RAD52,rad59	1	CAGL2A-19	pos	pos	neg	het	het	wt		het	SSA
RAD52,rad59	1	CAGL2A-20	pos	pos	neg	het	het	wt		het	SSA
RAD52,rad59	2	CAGL2A-1	pos	pos	neg	het	het	wt		het	SSA
RAD52,rad59	2	CAGL2A-2	pos	pos	neg	het	het	wt		het	SSA
RAD52,rad59	2	CAGL2A-3	pos	pos	neg	het	het	wt		het	SSA
RAD52,rad59	2	CAGL2A-4	pos	pos	neg	het	het	wt		het	SSA
RAD52,rad59	2	CAGL2A-5	pos	pos	neg	het	het	wt		het	SSA
RAD52,rad59	2	CAGL2A-6	pos	pos	neg	het	het	wt		het	SSA
RAD52,rad59	2	CAGL2A-7	pos	pos	neg	het	het	wt		het	SSA
RAD52,rad59	2	CAGL2A-8	pos	pos	neg	het	het	wt		het	SSA
RAD52,rad59	2	CAGL2A-9	pos	pos	neg	het	het	wt		het	SSA
RAD52,rad59	2	CAGL2A-10	pos	pos	neg	het	het	wt		het	SSA
RAD52,rad59	2	CAGL2A-11	pos	pos	neg	het	het	wt		het	SSA
RAD52,rad59	2	CAGL2A-12	pos	pos	neg	het	het	wt		het	SSA
RAD52,rad59	2	CAGL2A-13	pos	neg	neg	homb	homb	wt		het	IHR (XO/BIR)
RAD52,rad59	2	CAGL2A-14	pos	pos	neg	het	het	wt		het	SSA
RAD52,rad59	2	CAGL2A-15	pos	pos	neg	het	het	wt		het	SSA
RAD52,rad59	2	CAGL2A-16	pos	pos	neg	het	het	wt		het	SSA
RAD52,rad59	2	CAGL2A-17	pos	pos	neg	het	het	wt		het	SSA
RAD52,rad59	2	CAGL2A-18	pos	pos	neg	het	het	wt		het	SSA
RAD52,rad59	2	CAGL2A-19	pos	pos	neg	het	het	wt		het	SSA
RAD52,rad59	2	CAGL2A-20	pos	pos	neg	het	het	wt		het	SSA
RAD52,rad59	1	CAGL2B	pos	neg	pos, parent	het	het	wt		het
RAD52,rad59	1	CAGL2B-1	pos	neg	neg	homA	homA	wt		homA	CL
RAD52,rad59	1	CAGL2B-2	pos	pos	neg	het	het	wt		het	SSA
RAD52,rad59	1	CAGL2B-3	pos	neg	neg	homA	homA	wt		het	IHR (XO/BIR)
RAD52,rad59	1	CAGL2B-4	pos	neg	neg	homA	homA	wt		het	IHR (XO/BIR)
RAD52,rad59	1	CAGL2B-5	pos	pos	neg	het	het	wt		het	SSA
RAD52,rad59	1	CAGL2B-6	pos	pos	neg	het	het	wt		het	SSA
RAD52,rad59	1	CAGL2B-7	pos	pos	neg	het	het	wt		het	SSA
RAD52,rad59	1	CAGL2B-8	pos	pos	neg	het	het	wt		het	SSA
RAD52,rad59	1	CAGL2B-9	pos	pos	neg	het	het	wt		het	SSA
RAD52,rad59	1	CAGL2B-10	pos	pos	neg	het	het	wt		het	SSA
RAD52,rad59	1	CAGL2B-11	pos	pos	neg	het	het	wt		het	SSA
RAD52,rad59	1	CAGL2B-12	pos	pos	neg	het	het	wt		het	SSA
RAD52,rad59	1	CAGL2B-13	pos	pos	neg	het	het	wt		het	SSA
RAD52,rad59	1	CAGL2B-14	pos	pos	neg	het	het	wt		het	SSA
RAD52,rad59	1	CAGL2B-15	pos	neg	neg	homA	homA	wt		het	IHR (XO/BIR)
RAD52,rad59	1	CAGL2B-16	pos	pos	neg	het	het	wt		het	SSA
RAD52,rad59	1	CAGL2B-17	pos	pos	neg	het	het	wt		het	SSA
RAD52,rad59	1	CAGL2B-18	pos	pos	neg	het	het	wt		het	SSA
RAD52,rad59	1	CAGL2B-19	pos	pos	neg	het	het	wt		het	SSA
RAD52,rad59	1	CAGL2B-20	pos	pos	neg	het	het	wt		het	SSA
RAD52,rad59	1	CAGL2B-21	pos	pos	neg	het	het	wt		het	SSA
RAD52,rad59	1	CAGL2B-22	pos	pos	neg	het	het	wt		het	SSA
RAD52,rad59	1	CAGL2B-23	pos	pos	neg	het	het	wt		het	SSA
RAD52,rad59	1	CAGL2B-24	pos	pos	neg	het	het	wt		het	SSA
RAD52,rad59	2	CAGL2B-1	pos	pos	neg	het	het	wt		het	SSA
RAD52,rad59	2	CAGL2B-2	pos	pos	neg	het	het	wt		het	SSA
RAD52,rad59	2	CAGL2B-3	pos	neg	pos	het	het	wt		het	MI (URA3)
RAD52,rad59	2	CAGL2B-4	pos	pos	neg	het	het	wt		het	SSA
RAD52,rad59	2	CAGL2B-5	pos	pos	neg	het	het	wt		het	SSA
RAD52,rad59	2	CAGL2B-6	pos	pos	neg	het	het	wt		het	SSA
RAD52,rad59	2	CAGL2B-7	pos	pos	neg	het	het	wt		het	SSA
RAD52,rad59	2	CAGL2B-8	pos	pos	neg	het	het	wt		het	SSA
RAD52,rad59	2	CAGL2B-9	pos	pos	neg	het	het	wt		het	SSA
RAD52,rad59	2	CAGL2B-10	pos	neg	neg	homA	homA	wt		het	IHR (XO/BIR)
RAD52,rad59	2	CAGL2B-11	pos	pos	neg	het	het	wt		het	SSA
RAD52,rad59	2	CAGL2B-12	pos	pos	neg	het	het	wt		het	SSA
RAD52,rad59	2	CAGL2B-13	pos	pos	neg	het	het	wt		het	SSA
RAD52,rad59	2	CAGL2B-14	pos	pos	neg	het	het	wt		het	SSA
RAD52,rad59	2	CAGL2B-15	pos	neg	neg	homA	homA	wt		het	IHR (XO/BIR)
RAD52,rad59	2	CAGL2B-16	pos	pos	neg	het	het	wt		het	SSA
RAD52,rad59	2	CAGL2B-17	pos	pos	neg	het	het	wt		het	SSA
RAD52,rad59	2	CAGL2B-18	pos	pos	neg	het	het	wt (SNC)		het	SSA	Chr4-sized SNC
RAD52,rad59	2	CAGL2B-19	pos	pos	neg	het	het	wt (SNC)		het	SSA	Chr4-sized SNC
RAD52,rad59	2	CAGL2B-20	pos	pos	neg	het	het	wt		het	SSA
RAD52,rad51	expt1	CAGL3A	pos	neg	pos, parent	het	het	wt		het
RAD52,rad51	expt1	CAGL3A-1	pos	pos	neg	het	het	wt		het	SSA
RAD52,rad51	expt1	CAGL3A-2	pos	pos	neg	het	het	wt		het	SSA
RAD52,rad51	expt1	CAGL3A-3	pos	pos	neg	het	het	wt		het	SSA
RAD52,rad51	expt1	CAGL3A-4	pos	pos	neg	het	het	wt		het	SSA
RAD52,rad51	expt1	CAGL3A-5	pos	pos	neg	het	het	wt		het	SSA
RAD52,rad51	expt1	CAGL3A-6	pos	neg	neg	homb	het	wt+smallest		het	CT
RAD52,rad51	expt1	CAGL3A-7	pos	pos	neg	het	het	wt		het	SSA
RAD52,rad51	expt1	CAGL3A-8	pos	neg	neg	het	het	wt		het	IHR (GC/XO/BIR/HCO)
RAD52,rad51	expt1	CAGL3A-9	pos	neg	neg	het	het	wt		het	IHR (GC/XO/BIR/HCO)
RAD52,rad51	expt1	CAGL3A-10	pos	pos	neg	het	het	wt		het	SSA
RAD52,rad51	expt1	CAGL3A-11	pos	pos	neg	het	het	wt		het	SSA
RAD52,rad51	expt1	CAGL3A-12	pos	neg	neg	homb	het	wt+smallest		het	CT
RAD52,rad51	expt1	CAGL3A-13	pos	neg	neg	het	het	wt		het	IHR (GC/XO/BIR/HCO)
RAD52,rad51	expt1	CAGL3A-14	pos	neg	neg	het	het	wt+smaller		het	CT
RAD52,rad51	expt1	CAGL3A-15	pos	pos	neg	het	het	wt		het	SSA
RAD52,rad51	expt1	CAGL3A-16	pos	pos	neg	het	het	wt		het	SSA
RAD52,rad51	expt1	CAGL3A-17	pos	pos	neg	het	het	wt		het	SSA
RAD52,rad51	expt1	CAGL3A-18	pos	pos	neg	het	het	wt		het	SSA
RAD52,rad51	expt1	CAGL3A-19	pos	neg	neg	homb	het	wt+smallest		het	CT
RAD52,rad51	expt1	CAGL3A-20	pos	pos	neg	het	het	wt		het	SSA
RAD52,rad51	expt2	CAGL3A-1	pos	pos	neg	het	het	wt		het	SSA
RAD52,rad51	expt2	CAGL3A-2	pos	neg	neg	het	het	wt+largest		het	ECT
RAD52,rad51	expt2	CAGL3A-3	pos	pos	neg	het	het	wt		het	SSA
RAD52,rad51	expt2	CAGL3A-4	pos	pos	neg	het	het	wt		het	SSA
RAD52,rad51	expt2	CAGL3A-5	pos	pos	neg	het	het	wt		het	SSA
RAD52,rad51	expt2	CAGL3A-6	pos	pos	neg	het	het	wt		het	SSA
RAD52,rad51	expt2	CAGL3A-7	pos	neg	neg	het	het	wt+smaller		het	CT
RAD52,rad51	expt2	CAGL3A-8	pos	pos	neg	het	het	wt		het	SSA
RAD52,rad51	expt2	CAGL3A-9	pos	pos	neg	het	het	wt		het	SSA
RAD52,rad51	expt2	CAGL3A-10	pos	pos	neg	het	het	wt		het	SSA
RAD52,rad51	expt2	CAGL3A-11	pos	pos	neg	het	het	wt		het	SSA
RAD52,rad51	expt2	CAGL3A-12	pos	pos	neg	het	het	wt		het	SSA
RAD52,rad51	expt2	CAGL3A-13	pos	pos	neg	het	het	wt		het	SSA
RAD52,rad51	expt2	CAGL3A-14	pos	pos	neg	het	het	wt		het	SSA
RAD52,rad51	expt2	CAGL3A-15	pos	neg	neg	het	het	wt+smallest		het	CT
RAD52,rad51	expt2	CAGL3A-16	pos	pos	neg	het	het	wt		het	SSA
RAD52,rad51	expt2	CAGL3A-17	pos	pos	neg	het	het	wt		het	SSA
RAD52,rad51	expt2	CAGL3A-18	pos	neg	neg	het	het	wt+larger		het	ECT
RAD52,rad51	expt2	CAGL3A-19	pos	pos	neg	het	het	wt		het	SSA
RAD52,rad51	expt2	CAGL3A-20	pos	pos	neg	het	het	wt		het	SSA
RAD52,rad51	expt2	CAGL3A-21	pos	neg	neg	homb	het	wt+smallest		het	CT
RAD52,rad51	expt2	CAGL3A-22	pos	neg	neg	het	het	wt+smaller		het	CT
RAD52,rad51	expt2	CAGL3A-23	pos	neg	neg	homb	het	wt		het	IHR	ECT?
RAD52,rad51	expt2	CAGL3A-24	pos	pos	neg	het	het	wt		het	SSA
RAD52,rad51	expt2	CAGL3A-25	pos	neg	neg	het	het	wt+close to wt		het	CT
RAD52,rad51	expt2	CAGL3A-26	pos	pos	neg	het	het	wt		het	SSA
RAD52,rad51	expt2	CAGL3A-27	pos	pos	neg	het	het	wt		het	SSA
RAD52,rad51	expt2	CAGL3A-28	pos	pos	neg	het	het	wt		het	SSA
RAD52,rad51	expt2	CAGL3A-29	pos	pos	neg	het	het	wt		het	SSA
RAD52,rad51	expt2	CAGL3A-30	pos	pos	neg	het	het	wt		het	SSA
RAD52,rad51	expt1	CAGL3B	pos	neg	pos, parent	het	het	wt		het
RAD52,rad51	expt1	CAGL3B-1	pos	neg	neg	het	het	wt		het	IHR (GC/XO/BIR/HCO)
RAD52,rad51	expt1	CAGL3B-2	pos	pos	neg	het	het	wt		het	SSA
RAD52,rad51	expt1	CAGL3B-3	pos	pos	neg	het	het	wt		het	SSA
RAD52,rad51	expt1	CAGL3B-4	pos	pos	neg	het	het	wt		het	SSA
RAD52,rad51	expt1	CAGL3B-5	pos	pos	neg	het	het	wt		het	SSA
RAD52,rad51	expt1	CAGL3B-6	pos	pos	neg	het	het	wt		het	SSA
RAD52,rad51	expt1	CAGL3B-7	pos	pos	neg	het	het	wt		het	SSA
RAD52,rad51	expt1	CAGL3B-8	pos	pos	neg	het	het	wt		het	SSA
RAD52,rad51	expt1	CAGL3B-9	pos	neg	neg	homA	homA	wt		homA	CL
RAD52,rad51	expt1	CAGL3B-10	pos	pos	neg	het	het	wt		het	SSA
RAD52,rad51	expt1	CAGL3B-11	pos	pos	neg	het	het	wt		het	SSA
RAD52,rad51	expt1	CAGL3B-12	pos	neg	neg	homA	homA	wt		homA	CL
RAD52,rad51	expt1	CAGL3B-13	pos	pos	neg	het	het	wt		het	SSA
RAD52,rad51	expt1	CAGL3B-14	pos	pos	neg	het	het	wt		het	SSA
RAD52,rad51	expt1	CAGL3B-15	pos	pos	neg	het	het	wt		het	SSA
RAD52,rad51	expt1	CAGL3B-16	pos	pos	neg	het	het	wt		het	SSA
RAD52,rad51	expt1	CAGL3B-17	pos	pos	neg	het	het	wt		het	SSA
RAD52,rad51	expt1	CAGL3B-18	pos	pos	neg	het	het	wt		het	SSA
RAD52,rad51	expt1	CAGL3B-19	pos	pos	neg	het	het	wt		het	SSA
RAD52,rad51	expt1	CAGL3B-20	pos	pos	neg	het	het	wt		het	SSA
RAD52,rad51	expt2	CAGL3B	pos	neg	pos, parent	het	nd	wt		het
RAD52,rad51	expt2	CAGL3B-1	pos	pos	neg	het	nd	wt		het	SSA
RAD52,rad51	expt2	CAGL3B-2	pos	pos	neg	het	nd	wt		het	SSA
RAD52,rad51	expt2	CAGL3B-3	pos	pos	neg	het	nd	wt		het	SSA
RAD52,rad51	expt2	CAGL3B-4	pos	pos	neg	het	nd	wt		het	SSA
RAD52,rad51	expt2	CAGL3B-5	pos	pos	neg	het	nd	wt		het	SSA
RAD52,rad51	expt2	CAGL3B-6	pos	neg	neg	het	nd	wt		het	IHR (GC/XO/BIR/HCO)
RAD52,rad51	expt2	CAGL3B-7	pos	neg	neg	het	nd	wt+largest		het	ECT
RAD52,rad51	expt2	CAGL3B-8	pos	pos	neg	het	nd	wt		het	SSA
RAD52,rad51	expt2	CAGL3B-9	pos	pos	neg	het	nd	wt		het	SSA
RAD52,rad51	expt2	CAGL3B-10	pos	pos	neg	het	nd	wt		het	SSA
RAD52,rad51	expt2	CAGL3B-11	pos	pos	neg	het	nd	wt		het	SSA
RAD52,rad51	expt2	CAGL3B-12	pos	pos	neg	het	nd	wt		het	SSA
RAD52,rad51	expt2	CAGL3B-13	pos	pos	neg	het	nd	wt		het	SSA
RAD52,rad51	expt2	CAGL3B-14	pos	neg	neg	homA	nd	wt		homA	CL
RAD52,rad51	expt2	CAGL3B-15	pos	pos	neg	het	nd	wt		het	SSA
RAD52,rad51	expt2	CAGL3B-16	pos	neg	neg	homA	nd	wt		homA	CL
RAD52,rad51	expt2	CAGL3B-17	pos	neg	neg	homA	nd	wt		homA	CL
RAD52,rad51	expt2	CAGL3B-18	pos	pos	neg	het	nd	wt		het	SSA
RAD52,rad51	expt2	CAGL3B-19	pos	neg	neg	homA	nd	wt		homA	CL
RAD52,rad51	expt2	CAGL3B-20	pos	pos	neg	het	nd	wt		het	SSA
RAD52,rad51	expt2	CAGL3B-21	pos	neg	neg	homA	nd	wt		homA	CL
RAD52,rad51	expt2	CAGL3B-22	pos	neg	neg	homA	nd	wt		homA	CL
RAD52,rad51	expt2	CAGL3B-23	pos	pos	neg	het	nd	wt		het	SSA
RAD52,rad51	expt2	CAGL3B-24	pos	pos	neg	het	nd	wt		het	SSA
RAD52,rad51	expt2	CAGL3B-25	pos	neg	neg	homA	nd	wt		homA	CL
RAD52,rad51	expt2	CAGL3B-26	pos	pos	neg	het	nd	wt		het	SSA
RAD52,rad51	expt2	CAGL3B-27	pos	pos	neg	het	nd	wt		het	SSA
RAD52,rad51	expt2	CAGL3B-28	pos	pos	neg	het	nd	wt		het	SSA
RAD52,rad51	expt2	CAGL3B-29	pos	neg	neg	homA	nd	wt		homA	CL
RAD52,rad51	expt2	CAGL3B-30	pos	pos	neg	het	nd	wt		het	SSA
rad52	expt1	CAGL4A	neg	pos	pos, parent	het	het	wt		het
rad52	expt1	CAGL4A-1	nd	neg	neg	het	het	wt+smaller		het	CT
rad52	expt1	CAGL4A-2	nd	neg	neg	het	het	wt+smaller		het	CT
rad52	expt1	CAGL4A-3	nd	neg	neg	homb	het	wt+smallest		het	CT
rad52	expt1	CAGL4A-4	nd	neg	neg	het	het	wt+smaller		het	CT
rad52	expt1	CAGL4A-5	neg	neg	pos	het	het	wt+smaller		het	MI
rad52	expt1	CAGL4A-6	nd	neg	neg	het	het	wt+smaller		het	CT
rad52	expt1	CAGL4A-7	nd	neg	neg	het	het	wt+smaller		het	CT
rad52	expt1	CAGL4A-8	nd	neg	neg	homb	het	wt+smallest		het	CT
rad52	expt1	CAGL4A-9	nd	neg	neg	het	het	wt+smaller		het	CT
rad52	expt1	CAGL4A-10	nd	neg	neg	het	het	wt+smaller		het	CT
rad52	expt1	CAGL4A*	neg	pos	pos, parent	het	het	wt		het	parent
rad52	expt1	CAGL4A*-1	nd	pos	neg	het	het	wt		het	SSA
rad52	expt1	CAGL4A*-2	nd	pos	neg	homb	het	wt+smallest		het	CT
rad52	expt1	CAGL4A*-3	nd	pos	neg	homb	het	wt+smallest		het	CT
rad52	expt1	CAGL4A*-4	nd	pos	neg	homb	het	wt+smallest		het	CT
rad52	expt1	CAGL4A*-5	nd	pos	neg	het	het	wt+smaller		het	CT
rad52	expt1	CAGL4A*-6	nd	pos	neg	homb	het	wt+smaller		het	CT
rad52	expt1	CAGL4A*-7	nd	pos	neg	homb	het	wt+smallest		het	CT
rad52	expt1	CAGL4A*-8	nd	pos	neg	homb	het	wt+smallest		het	CT
rad52	expt1	CAGL4B	neg	pos	pos, parent	het	het	wt		het
rad52	expt1	CAGL4B-1	nd	pos	neg	het	het	wt+smallest		het	CT
rad52	expt1	CAGL4B-2	nd	pos	neg	het	het	wt+smaller		het	CT
rad52	expt1	CAGL4B-3	nd	pos	neg	homa	het	wt+smaller		het	CT
rad52	expt1	CAGL4B-4	nd	pos	neg	homa	homa	nd		homa	CL
rad52	expt1	CAGL4B-5	nd	pos	neg	homa	homa	nd		homa	CL
rad52	expt1	CAGL4B-6	nd	pos	neg	het	het	wt+smaller		het	CT
rad52	expt1	CAGL4B-7	nd	pos	neg	het	het	wt+smaller		het	CT
rad52	expt1	CAGL4B-8	nd	pos	neg	homa	homa	nd		homa	CL
rad52	expt1	CAGL4B-9	nd	pos	neg	het	het	wt		het	SSA
rad52	expt1	CAGL4B-10	nd	pos	neg	het	het	wt		het	SSA
rad52	expt1	CAGL4B-11	nd	pos	neg	het	het	wt+smaller		het	CT
rad52	expt1	CAGL4B-12	nd	pos	neg	het	het	wt		het	SSA
rad52	expt1	CAGL4B-13	nd	nd	neg	homa	homa	nd		homa	CL
rad52	expt1	CAGL4B-14	nd	nd	neg	homa	homa	nd		homa	CL
rad52	expt1	CAGL4B-15	nd	nd	neg	homa	het	wt+smallest		het	CT
rad52	expt1	CAGL4B-16	nd	pos	neg	het	het	nd		het	SSA
rad52	expt1	CAGL4B-17	nd	nd	neg	het	het	wt+smallest		het	CT
rad52	expt1	CAGL4B-18	nd	nd	neg	homa	homa	nd		homa	CL
rad52	expt1	CAGL4B-19	nd	nd	neg	het	het	wt+smaller		het	CT
rad52	expt1	CAGL4B-20	nd	nd	neg	homa	het	wt+smaller		het	CT
rad52,rad59	expt1	CAGL5A	neg	pos	pos, parent	het	het	nd		het
rad52,rad59	expt1	CAGL5A-1	nd	nd	neg	het	het	wt+smaller		het	CT
rad52,rad59	expt1	CAGL5A-2	nd	nd	neg	het	het	wt+smaller		het	CT
rad52,rad59	expt1	CAGL5A-3	nd	nd	neg	het	het	wt+smaller		het	CT
rad52,rad59	expt1	CAGL5A-4	nd	nd	neg	homb	het	wt+smallest		het	CT
rad52,rad59	expt1	CAGL5A-5	nd	nd	neg	het	het	wt+smaller		het	CT
rad52,rad59	expt1	CAGL5A-6	neg	pos	neg	het	het	wt		het	SSA
rad52,rad59	expt1	CAGL5A-7	nd	nd	neg	homb	het	wt+smallest		het	CT
rad52,rad59	expt1	CAGL5A-8	nd	nd	neg	het	het	wt+smaller		het	CT
rad52,rad59	expt1	CAGL5A-9	nd	nd	neg	het	het	wt+smaller		het	CT
rad52,rad59	expt1	CAGL5A-10	nd	nd	neg	het	het	wt+smaller		het	CT
rad52,rad59	expt2	CAGL5A-1	nd	pos	neg	het	het	wt		het	SSA
rad52,rad59	expt2	CAGL5A-2	nd	nd	neg	homb		wt+smallest		het	CT
rad52,rad59	expt2	CAGL5A-3	neg	pos	neg	het	het	wt		het	SSA
rad52,rad59	expt2	CAGL5A-4	nd	nd	neg	het	het	wt+smaller		het	CT
rad52,rad59	expt2	CAGL5A-5	nd	nd	neg	het	het	wt+smaller		het	CT
rad52,rad59	expt2	CAGL5A-6	nd	nd	neg	het	het	wt+smaller		het	CT
rad52,rad59	expt2	CAGL5A-7	neg	pos	neg	het	het	wt		het	SSA
rad52,rad59	expt2	CAGL5A-8	nd	nd	neg	het	het	wt+smaller		het	CT
rad52,rad59	expt2	CAGL5A-9	neg	pos	neg	het	het	wt		het	SSA
rad52,rad59	expt2	CAGL5A-10	nd	nd	neg	het	het	wt+smaller		het	CT
rad52,rad59	expt2	CAGL5A-11	nd	nd	neg	het	het	wt+smaller		het	CT
rad52,rad59	expt2	CAGL5A-12	neg	pos	neg	het	het	wt		het	SSA
rad52,rad59	expt2	CAGL5A-13	neg	pos	neg	het	het	wt		het	SSA
rad52,rad59	expt2	CAGL5A-14	nd	nd	neg	het	het	wt+smaller		het	CT
rad52,rad59	expt2	CAGL5A-15	nd	nd	neg	het	het	wt+smaller		het	CT
rad52,rad59	expt2	CAGL5A-16	nd	nd	neg	het	het	wt+smaller		het	CT
rad52,rad59	expt2	CAGL5A-17	nd	nd	neg	het	het	wt+smaller		het	CT
rad52,rad59	expt2	CAGL5A-18	nd	nd	neg	het	het	wt+smaller		het	CT
rad52,rad59	expt2	CAGL5A-19	neg	pos	neg	het	het	wt		het	SSA
rad52,rad59	expt2	CAGL5A-20	nd	nd	neg	homb	het	wt+smallest		het	CT
rad52,rad59	expt1	CAGL5B	neg	pos	pos, parent	het	het	wt		het	parent
rad52,rad59	expt1	CAGL5B-1	neg	pos	neg	het	het	wt		het	SSA
rad52,rad59	expt1	CAGL5B-2	neg	pos	neg	het	het	wt		het	SSA
rad52,rad59	expt1	CAGL5B-3	nd	nd	neg	het	het	wt+smaller		het	CT
rad52,rad59	expt1	CAGL5B-4	nd	nd	neg	het	het	wt+smaller		het	CT
rad52,rad59	expt1	CAGL5B-5	nd	nd	neg	het	het	wt+smaller		het	CT
rad52,rad59	expt1	CAGL5B-6	nd	nd	neg	het	het	wt+smallest		het	CT
rad52,rad59	expt1	CAGL5B-7	nd	nd	neg	homa	het	wt+smallest		het	CT
rad52,rad59	expt1	CAGL5B-8	nd	nd	neg	het	het	wt+smallest		het	CT
rad52,rad59	expt1	CAGL5B-9	nd	nd	neg	homa	homa	wt		homa	CL
rad52,rad59	expt2	CAGL5B-1	nd	nd	neg	het	nd	wt+smaller		het	CT
rad52,rad59	expt2	CAGL5B-2	nd	nd	neg	het	nd	wt+smaller		het	CT
rad52,rad59	expt2	CAGL5B-3	nd	pos	neg	het	nd	wt		het	SSA
rad52,rad59	expt2	CAGL5B-4	nd	nd	neg	het	nd	wt+smaller		het	CT
rad52,rad59	expt2	CAGL5B-5	nd	nd	neg	het	nd	wt+smaller		het	CT
rad52,rad59	expt2	CAGL5B-6	nd	nd	neg	homa	nd	wt		homb	CL plus XO??	complex event
rad52,rad59	expt2	CAGL5B-7	nd	nd	neg	het	nd	wt+smaller		het	CT
rad52,rad59	expt2	CAGL5B-8	nd	nd	neg	het	nd	wt+smaller		het	CT
rad52,rad59	expt2	CAGL5B-9	nd	nd	neg	het	nd	wt+smaller		het	CT
rad52,rad59	expt2	CAGL5B-10	nd	nd	neg	het	nd	wt+smallest		het	CT
rad52,rad59	expt2	CAGL5B-11	nd	nd	neg	het	nd	wt+smallest		het	CT
rad52,rad59	expt2	CAGL5B-12	nd	nd	neg	het	nd	wt+smallest		het	CT
rad52,rad59	expt2	CAGL5B-13	nd	nd	neg	hm	nd	wt		hm	CT
rad52,rad59	expt2	CAGL5B-14	nd	nd	neg	het	nd	wt+smaller		het	CT
rad52,rad59	expt2	CAGL5B-15	nd	nd	neg	homa	nd	wt+smaller		het	CT
rad52,rad59	expt2	CAGL5B-16	nd	nd	neg	het	nd	wt+smaller		het	CT
rad52,rad59	expt2	CAGL5B-17	nd	nd	neg	homa	nd	wt		homa	CL
rad52,rad59	expt2	CAGL5B-18	nd	nd	neg	homa	nd	wt+smaller		het	CT
rad52,rad59	expt2	CAGL5B-19	neg	pos	neg	het	nd	wt		het	SSA
rad52,rad59	expt2	CAGL5B-20	nd	nd	neg	het	nd	wt+smallest		het	CT
rad52,lig4	expt1	CAGL6B	neg	pos	pos, parent	het	het	wt		het
rad52,lig4	expt1	CAGL6B-1	nd	nd	neg	het	het	wt+smallest		het	CT
rad52,lig4	expt1	CAGL6B-2	nd	nd	neg	het	het	wt+smallest		het	CT
rad52,lig4	expt1	CAGL6B-3	nd	nd	neg	homa	homa			homa	CL
rad52,lig4	expt1	CAGL6B-4	nd	nd	neg	het	het	wt+smaller		het	CT
rad52,lig4	expt1	CAGL6B-5	nd	nd	neg	homa	homa			homa	CL
rad52,lig4	expt1	CAGL6B-6	neg	pos	neg	homa	het	wt		het	SSA	snp122 hom
rad52,lig4	expt1	CAGL6B-7	nd	nd	neg	homa	homa			homa	CL
rad52,lig4	expt1	CAGL6B-8	nd	nd	neg	het	het	wt+smallest		het	CT
rad52,lig4	expt1	CAGL6B-9	nd	nd	neg	het	het	wt+smallest		het	CT
rad52,lig4	expt1	CAGL6B-10	nd	nd	neg	het	het	wt+smallest		het	CT
rad52,lig4	expt1	CAGL6B-11	nd	nd	neg	homa	homa			homa	CL
rad52,lig4	expt1	CAGL6B-12	nd	nd	neg	homa	homa			homa	CL
rad52,lig4	expt1	CAGL6B-13	nd	nd	neg	homa	homa			homa	CL
rad52,lig4	expt1	CAGL6B-14	nd	nd	neg	homa	homa			homa	CL
rad52,lig4	expt1	CAGL6B-15	nd	nd	neg	het	het	wt+smaller		het	CT
rad52,lig4	expt1	CAGL6B-16	nd	nd	neg	homa	homa			homa	CL
rad52,lig4	expt1	CAGL6B-17	nd	nd	neg	het	het	wt+smaller		het	CT
rad52,lig4	expt1	CAGL6B-18	nd	nd	neg	het	het	wt+smaller		het	CT
rad52,lig4	expt1	CAGL6B-19	nd	nd	neg	homa	homa			homa	CL
rad52,lig4	expt1	CAGL6B-20	nd	nd	neg	homa	homa			homa	CL
rad52,lig4	expt1	CAGL6B-21	nd	nd	neg	het	het	wt+smaller		het	CT
rad52,lig4	expt1	CAGL6B-22	nd	nd	neg	het	het	wt+smaller		het	CT
rad52,lig4	expt1	CAGL6B-23	nd	nd	neg	homa	homa			homa	CL
rad52,lig4	expt1	CAGL6B-24	nd	nd	neg	het	het	wt+smaller		het	CT
rad52,lig4	expt2	CAGL6B-1	nd	nd	neg	het	het	wt+smallest		het	CT
rad52,lig4	expt2	CAGL6B-2	nd	nd	neg	het	het	wt+smaller		het	CT
rad52,lig4	expt2	CAGL6B-3	nd	nd	neg	het	het	wt+smallest		het	CT
rad52,lig4	expt2	CAGL6B-4	nd	nd	neg	het	het	wt+smallest		het	CT
rad52,lig4	expt2	CAGL6B-5	nd	nd	neg	het	het	wt+smaller		het	CT
rad52,lig4	expt2	CAGL6B-6	nd	nd	neg	het	het	wt+smaller		het	CT
rad52,lig4	expt2	CAGL6B-7	nd	nd	neg	het	het	wt+smaller		het	CT
rad52,lig4	expt2	CAGL6B-8	nd	nd	neg	het	het	wt+smaller		het	CT
rad52,lig4	expt2	CAGL6B-9	nd	nd	neg	het	het	wt+smaller		het	CT
rad52,lig4	expt2	CAGL6B-10	nd	nd	neg	homa	homa			homa	CL
rad52,lig4	expt2	CAGL6B-11	nd	nd	neg	het	het	wt+smaller		het	CT
rad52,lig4	expt2	CAGL6B-12	nd	nd	neg	homa	homa			homa	CL
rad52,lig4	expt2	CAGL6B-13	nd	nd	neg	het	het	wt+smaller		het	CT
rad52,lig4	expt2	CAGL6B-14	neg	pos	neg	het	het	wt		het	SSA
rad52,lig4	expt2	CAGL6B-15	nd	nd	neg	homa	homa	wt		homa	CL
rad52,lig4	expt2	CAGL6B-16	nd	nd	neg	homa	homa	wt		homa	CL
rad52,lig4	expt2	CAGL6B-17	neg	pos	neg	het	het	wt		het	SSA
rad52,lig4	expt2	CAGL6B-18	nd	nd	neg	homa	homa	wt		homa	CL
rad52,lig4	expt2	CAGL6B-19	neg	pos	neg	het	het	wt		het	SSA
rad52,lig4	expt2	CAGL6B-20	nd	nd	neg	homa	homa	wt		homa	CL
rad52		CAGL4A-FRT	neg	neg	pos, parent	Het	Het			Het
rad52	expt1	CAGL4A-FRT-1	neg	neg	nd	Het	Het	wt+smaller		Het	CT
rad52	expt1	CAGL4A-FRT-2	neg	neg	nd	Homb	Het	wt+smaller		Het	CT
rad52	expt1	CAGL4A-FRT-3	neg	pos	nd	Het	Het	wt		Het	SSA
rad52	expt1	CAGL4A-FRT-4	neg	pos	nd	Het	Het	wt		Het	SSA
rad52	expt1	CAGL4A-FRT-5	neg	neg	nd	Het	Het	wt+smaller		Het	CT
rad52	expt1	CAGL4A-FRT-6	neg	neg	nd	Het	Het	wt+smaller		Het	CT
rad52	expt1	CAGL4A-FRT-7	neg	pos	nd	Het	Het	wt		Het	SSA
rad52	expt1	CAGL4A-FRT-8	neg	neg	nd	Het	Het	wt+smaller		Het	CT
rad52	expt1	CAGL4A-FRT-9	neg	neg	nd	Het	Het	wt+smaller		Het	CT
rad52	expt1	CAGL4A-FRT-10	neg	neg	nd	Het	Het	???		Het	CT
rad52	expt1	CAGL4A-FRT-11	neg	pos	nd	Het	Het	wt		Het	SSA
rad52	expt1	CAGL4A-FRT-12	neg	neg	nd	Homb	Het	wt+smaller		Het	CT
rad52	expt1	CAGL4A-FRT-13	neg	neg	nd	Het	Het	wt+smaller		Het	CT
rad52	expt1	CAGL4A-FRT-14	neg	neg	nd	Het	Het	wt+smaller		Het	CT
rad52	expt1	CAGL4A-FRT-15	neg	neg	nd	Homb	Het	wt +smaller		Het	CT
rad52	expt1	CAGL4A-FRT-16	neg	neg	nd	Het	Het	?		Het	CT
rad52	expt1	CAGL4A-FRT-17	neg	neg	nd	Homb	Het	wt+smaller		Het	CT
rad52	expt1	CAGL4A-FRT-18	neg	pos	nd	Het	Het	wt		Het	SSA
rad52	expt1	CAGL4A-FRT-19	neg	neg	nd	Het	Het	wt+smaller		Het	CT
rad52	expt1	CAGL4A-FRT-20	neg	neg	nd	Het	Het	wt+smaller		Het	CT
rad52	expt1	CAGL4B-FRT	neg	neg	pos, parent	Het	Het	wt		Het
rad52	expt1	CAGL4B-FRT1	neg	neg	nd	Homa	Homa	wt		Homa	CL
rad52	expt1	CAGL4B-FRT2	neg	neg	nd	Het	Het	wt+smaller		Het	CT
rad52	expt1	CAGL4B-FRT3	neg	neg	nd	Het	Het	wt+smaller		Het	CT
rad52	expt1	CAGL4B-FRT4	neg	neg	nd	Het	Het	wt+smaller		Het	CT
rad52	expt1	CAGL4B-FRT5	neg	neg	nd	Het	Het	wt+smaller		Het	CT
rad52	expt1	CAGL4B-FRT6	neg	neg	nd	Homa	Homa	wt		Homa	CL
rad52	expt1	CAGL4B-FRT7	neg	neg	nd	Het	Het	wt+smaller		Het	CT
rad52	expt1	CAGL4B-FRT8	neg	neg	nd	Homa	Homa	wt		Homa	CL
rad52	expt1	CAGL4B-FRT9	neg	neg	nd	Het	Het	wt+smaller		Het	CT
rad52	expt1	CAGL4B-FRT10	neg	neg	nd	Homa	Homa	wt		Homa	CL	3 x Chr6?
rad52	expt1	CAGL4B-FRT11	neg	neg	nd	Homa	Homa	wt		Homa	CL
rad52	expt1	CAGL4B-FRT12	neg	neg	nd	Homa	Het	wt+smaller		Het	CT
rad52	expt1	CAGL4B-FRT13	neg	pos	pos	Het	Het	wt		Het	SSA
rad52	expt1	CAGL4B-FRT14	neg	neg	nd	Het	Het	wt+smaller		Het	CT
rad52	expt1	CAGL4B-FRT15	neg	neg	nd	Homa	Homa	wt		Homa	CL
rad52	expt1	CAGL4B-FRT16	neg	neg	nd	Homa	Homa	wt		Homa	CL
rad52	expt1	CAGL4B-FRT17	neg	pos	nd	Het	Het	wt		Het	SSA
rad52	expt1	CAGL4B-FRT18	neg	neg	nd	Homa	Homa	wt		Homa	CL
rad52	expt1	CAGL4B-FRT19	neg	neg	nd	Het	Het	wt+smaller		Het	CT
rad52	expt1	CAGL4B-FRT20	neg	neg	nd	Homa	Homa	wt		Homa	CL
rad52rad59	expt1	CAGL5B**-FRT	neg	neg	pos parent	Het	Het	wt		Het
rad52, rad59	expt1	CAGL5B**-FRT1	neg	neg	nd	Het	Het	wt+smaller		Het	CT
rad52, rad59	expt1	CAGL5B**-FRT2	neg	neg	nd	Het	Het	wt+smaller		Het	CT
rad52, rad59	expt1	CAGL5B**-FRT3	neg	neg	nd	Het	Het	wt+smaller		Het	CT
rad52, rad59	expt1	CAGL5B**-FRT4	neg	neg	nd	Homa	Het	wt+smaller		Het	CT
rad52, rad59	expt1	CAGL5B**-FTR5	neg	neg	nd	Het	Het	wt+smaller		Het	CT
rad52, rad59	expt1	CAGL5B**-FRT6	neg	pos	nd	Het	Het	wt		Het	SSA
rad52, rad59	expt1	CAGL5B**-FRT7	neg	neg	nd	Het	Het	wt+smaller		Het	CT
rad52, rad59	expt1	CAGL5B**-FRT8	neg	neg	nd	Homa	Homa	wt		Homa	CL	3 x Chr6 or a fragment of a larger chromosome comigrates with Chr6
rad52, rad59	expt1	CAGL5B**-FRT9	neg	neg	nd	Het	Het	wt+smaller		Het	CT
rad52, rad59	expt1	CAGL5B**-FRT10	neg	neg	nd	Het	Het	wt+smaller		Het	CT
rad52, rad59	expt1	CAGL5B**-FRT11	neg	neg	nd	Het	Het	wt+smaller		Het	CT
rad52, rad59	expt1	CAGL5B**-FRT12	neg	pos	nd	Het	Het	wt+smaller??		Het	SSA	SNC from a larger chromosome
rad52, rad59	expt1	CAGL5B**-FRT13	neg	neg	nd	Het	Het	wt+smaller		Het	CT
rad52, rad59	expt1	CAGL5B**-FRT14	neg	neg	nd	Homa	Het	wt+smaller		Het	CT
rad52, rad59	expt1	CAGL5B**-FRT15	neg	neg	nd	Het	Het	wt		Het	??	complex event
rad52, rad59	expt1	CAGL5B**-FRT16	neg	neg	nd	Homa	Het	wt+smaller		Het	CT
rad52, rad59	expt1	CAGL5B**-FRT17	neg	neg	nd	Homa	Homa	wt		Homa	CL
rad52, rad59	expt1	CAGL5B**-FRT18	neg	pos	nd	Het	Het	wt		Het	SSA
rad52, rad59	expt1	CAGL5B**-FRT19	neg	neg	nd	Homa	Homa	wt		Homa	CL
rad52, rad59	expt1	CAGL5B**-FRT20	neg	neg	nd	Homa	Homa	wt		Homa	CL
rad52, rad59	expt1	CAGL5B-FRT	neg	neg	pos, parent	Het	Het			Het
rad52, rad59	expt1	CAGL5B-FRT1	neg	neg	nd	Het	Het	wt + smaller		Het	CT
rad52, rad59	expt1	CAGL5B-FRT2	neg	neg	nd	Homa	Homa	wt		Homa	CL
rad52, rad59	expt1	CAGL5B-FRT3	neg	neg	nd	Homa	Homa	wt		Homa	CL
rad52, rad59	expt1	CAGL5B-FRT4	neg	neg	nd	Homa	Homa	wt		Homa	CL
rad52, rad59	expt1	CAGL5B-FRT5	neg	neg	nd	Homa	Het	wt + smaller		Het	CT
rad52, rad59	expt1	CAGL5B-FRT6	neg	neg	nd	Homa	Homa	wt		Homa	CL
rad52, rad59	expt1	CAGL5B-FRT7	neg	pos	nd	Het	Het	wt		Het	SSA
rad52, rad59	expt1	CAGL5B-FRT8	neg	neg	nd	Homa	Homa	wt		Homa	CL
rad52, rad59	expt1	CAGL5B-FRT9	neg	neg	nd	Homa	Het	wt + smaller		Het	CT
rad52, rad59	expt1	CAGL5B-FRT10	neg	neg	nd	Homa	Het	wt + smaller		Het	CT
rad52, rad59	expt1	CAGL5B-FRT11	neg	neg	nd	Homa	Homa	wt		Homa	CL
rad52, rad59	expt1	CAGL5B-FRT12	neg	pos	nd	Het	Het	wt		Het	SSA
rad52, rad59	expt1	CAGL5B-FRT13	neg	neg	nd	Homa	Homa	wt		Homa	CL
rad52, rad59	expt1	CAGL5B-FRT14	neg	neg	nd	Homa	Het	wt + smaller		Het	CT
rad52, rad59	expt1	CAGL5B-FRT15	neg	neg	nd	Homa	Homa	wt		Homa	CL
rad52, rad59	expt1	CAGL5B-FRT16	neg	pos	nd	Het	Het	wt		Het	SSA
rad52, rad59	expt1	CAGL5B-FRT17	neg	pos	nd	Het	Het	wt		Het	SSA
rad52, rad59	expt1	CAGL5B-FRT18	neg	neg	nd	Het	Het	wt+smaller		Het	CT
rad52, rad59	expt1	CAGL5B-FRT19	neg	neg	nd	Het	Het	wt+smaller		Het	CT
rad52, rad59	expt1	CAGL5B-FRT20	neg	pos	nd	Het	Het	wt		Het	SSA
rad52, lig4		CAGL6B-FRT	neg		pos, parent	Het	Het			Het
rad52, lig4	expt1	CAGL6B-FRT1	neg	neg	nd	Homa	Homa	wt (SCN)		Homa	CL	SCN from other chromosome?
rad52, lig4	expt1	CAGL6B-FRT2	neg	neg	nd	Het	Het	wt+smaller		Het	CT
rad52, lig4	expt1	CAGL6B-FRT3	neg	neg	nd	Homa	Homa	wt		Homa	CL
rad52, lig4	expt1	CAGL6B-FRT4	neg	neg	nd	Het	Het	wt+smaller		Het	CT
rad52, lig4	expt1	CAGL6B-FRT5	neg	neg	nd	Het	Het	wt+smaller		Het	CT
rad52, lig4	expt1	CAGL6B-FRT6	neg	neg	nd	Homa	Homa	wt		Homa	CL
rad52, lig4	expt1	CAGL6B-FRT7	neg	neg	nd	Homa	Homa	wt		Homa	CL
rad52, lig4	expt1	CAGL6B-FRT8	neg	neg	nd	Homa	Homa	wt		Homa	CL
rad52, lig4	expt1	CAGL6B-FRT9	neg	neg	nd	Homa	Homa	wt		Homa	CL
rad52, lig4	expt1	CAGL6B-FRT10	neg	neg	nd	Homa	Homa	wt		Homa	CL
rad52, lig4	expt1	CAGL6B-FRT11	neg	neg	nd	Het	Het	wt+smaller		Het	CT
rad52, lig4	expt1	CAGL6B-FRT12	neg	pos	nd	Het	Het	wt		Het	SSA
rad52, lig4	expt1	CAGL6B-FRT13	neg	neg	nd	Homa	Homa	wt		Homa	CL
rad52, lig4	expt1	CAGL6B-FRT14	neg	neg	nd	Het	Het	wt+smaller		Het	CT
rad52, lig4	expt1	CAGL6B-FRT15	neg	neg	nd	Het	Het	CT		Het	CT
rad52, lig4	expt1	CAGL6B-FRT16	neg	neg	nd	Homa	Homa	wt		Homa	CL
rad52, lig4	expt1	CAGL6B-FRT17	neg	neg	nd	Het	Het	wt+smaller		Het	CT
rad52, lig4	expt1	CAGL6B-FRT18	neg	neg	nd	Homa	Homa	wt		Homa	CL
rad52, lig4	expt1	CAGL6B-FRT19	neg	neg	nd	Homa	Homa	wt		Homa	CL
rad52, lig4	expt1	CAGL6B-FRT20	neg	neg	nd	Homa	Homa	wt+smaller		Het	CT
